# Supplementary material
Source: Springer Nature journal article supplement (https://www.springermedizin.de/resource/supplementary/12871_2014_326_MOESM9_ESM.pdf/9429108)

**Cyt-c**  
(mitochondria)

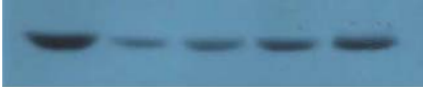

**Cyt-c**  
(cytosol)

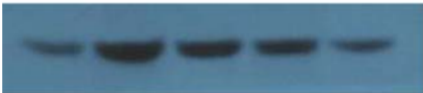

**$\beta$ -actin**

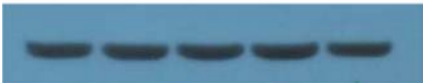

a

b

c

d

e

Supplement: MOESM9 [file 9429108]
